# Supplementary material for: An Unusual Diagnosis for an Infant Presenting with Olive-Shaped Abdominal Mass
Source: Case Rep Pediatr. 2023 Sep 25;2023:6924037. doi: 10.1155/2023/6924037 (PMC10545470; doi:10.1155/2023/6924037)
Supplement: Supplementary Materials — Video 1: Multiple cautery marks on the abdomen, a traditional Arab healing practice that aims to relief symptoms. In skin cautery, a hot iron or coal is applied to the skin of the diseased body part for a few seconds in a symmetrical configuration, yielding permanent oval scars. Video 2 and 3: A firm olive-shaped mass resembling Gastric peristaltic wave is seen progressing across the abdomen. [file 6924037.f1.zip]

Archive with 3 entries (3 files):
- video 1.mp4
- video 2.mp4
- video 3.mp4
